# Supplementary material for: Eliminating Seclusion and Restraint in Recovery-Oriented Crisis Services
Source: Atypon-hosted journal article supplement (doi:10.1176/ps.2008.59.10.1198), 2008-10-01
Supplement: pss_59_10_1198_01.pdf [file pss_59_10_1198_01.pdf]

SuppT1:

Ethnic and gender characteristics for people served (June 2005)

| Ethnicity        | Male   |        | Female |        | Total  |        |
|------------------|--------|--------|--------|--------|--------|--------|
|                  | Number | %      | Number | %      | Number | %      |
| White            | 441    | 64.9%  | 374    | 68.1%  | 815    | 66.4%  |
| African American | 67     | 9.9%   | 52     | 9.5%   | 119    | 9.7%   |
| Hispanic         | 116    | 17.1%  | 64     | 11.7%  | 180    | 14.7%  |
| Native American  | 9      | 1.3%   | 11     | 2.0%   | 20     | 1.6%   |
| Asian            | 15     | 2.2%   | 6      | 1.1%   | 21     | 1.7%   |
| Not Reported     | 31     | 4.6%   | 42     | 7.7%   | 73     | 5.9%   |
| Total            | 679    | 100.0% | 549    | 100.0% | 1228   | 100.0% |

SuppT2:

Primary diagnosis given to approximately 14,500 patients of the crisis centers

| Primary Diagnosis                                      | %    |
|--------------------------------------------------------|------|
| Schizophrenia, schizoaffective, and psychotic disorder | 27.0 |
| Major depression and mood disorder                     | 31.8 |
| Bipolar disorder                                       | 15.7 |
| Substance abuse                                        | 15.1 |
| Anxiety disorder                                       | 2.3  |
| Other                                                  | 8.1  |

SuppT3:

Staff disciplines on a typical shift at the higher volume center

| Discipline                    | Number |
|-------------------------------|--------|
| Shift Manager (Masters Level) | 1      |
| Psychiatrist                  | 2      |
| Registered Nurse              | 2      |
| Masters Counselor             | 3      |
| Behavioral Health Technicians | 4      |
| Peer Support Specialists      | 2      |
| Unit Secretary                | 2      |
| Total                         | 16     |

SuppT4

Number of staff injuries in each center

---

| Year | <u>Number of Staff Injuries</u> |                  |
|------|---------------------------------|------------------|
|      | PRC Central (large)             | PRC West (small) |
| 2000 | 9                               | 15               |
| 2001 | 8                               | 6                |
| 2002 | 19                              | 9                |
| 2003 | 8                               | 7                |
| 2004 | 8                               | 5                |

---
