# Supplementary material for: Eliminating Seclusion and Restraint in Recovery-Oriented Crisis Services
Source: Atypon-hosted journal article supplement (doi:10.1176/ps.2008.59.10.1198), 2008-10-01

SuppF1.

Quarterly indicators of seclusion and restraint for both crisis centers<sup>a</sup>

<sup>a</sup> West, smaller crisis center; Central, larger crisis center

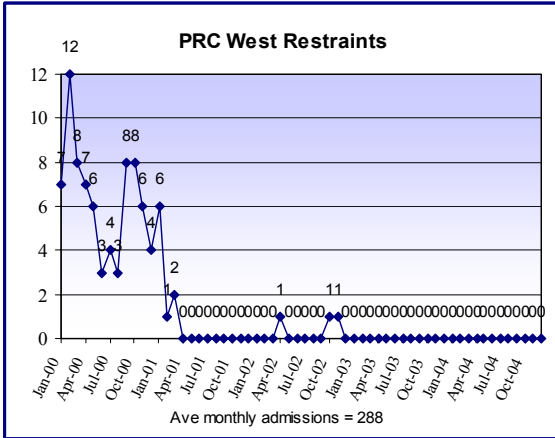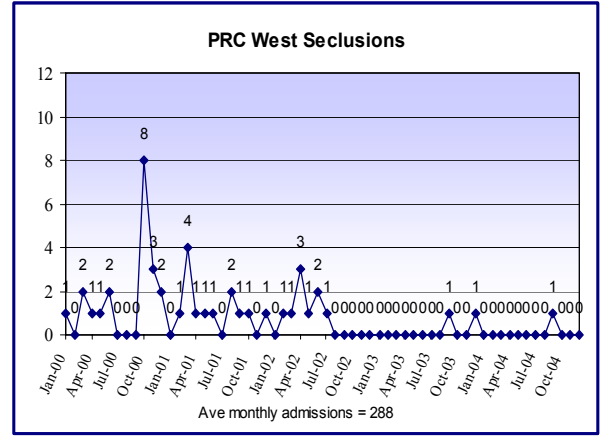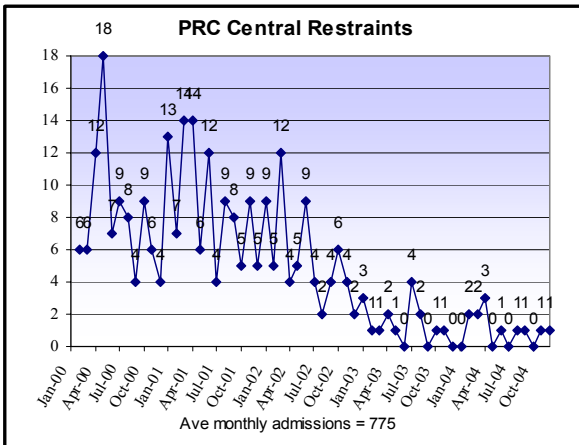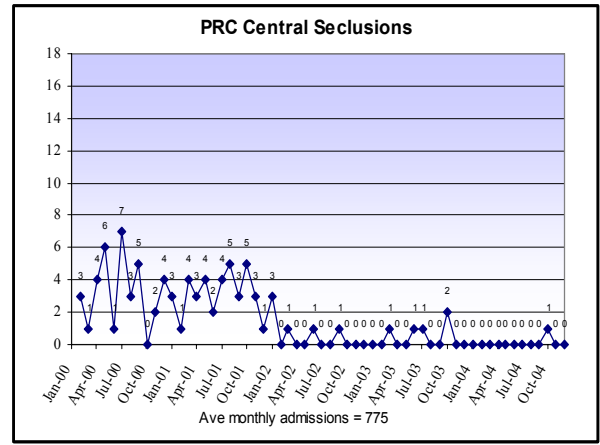

Supplement: pss_59_10_1198_02.pdf [file pss_59_10_1198_02.pdf]
